# Supplementary material
Source: Springer Nature journal article supplement (https://www.springermedizin.de/resource/supplementary/12891_2008_539_MOESM1_ESM.pdf/9511272)
Supplement: MOESM1 [file 9511272]

Randomisation  
n=146

Control group

Intervention group

Baseline  
assessment

Baseline  
assessment

Week 8  
assessment

Week 8 assessment

6-month  
assessment

6-month  
assessment

6-month control period

**6 Week OAK S-M  
program**
